# Supplementary material for: Fluorosubstitution of the Molecular Core in Chiral Esters with Short Terminal Carbon Chains: Influence on Physical Properties
Source: MDPI journal article supplement (doi:10.3390/cryst12081028), 2022-07-24
Supplement: s1 [file s1]

## Fluorosubstitution of the Molecular Core in Chiral Esters with Short Terminal Carbon Chains: Influence on Physical Properties

Aleksandra Deptuch<sup>1,2\*</sup>, Marcin Piwowarczyk<sup>1</sup>, Małgorzata Jasiurkowska-Delaporte<sup>1</sup>, Jungeun Kim<sup>3</sup>, Magdalena Urbańska<sup>4</sup>, Maciej Skolarczyk<sup>2, #</sup>, Teresa Jaworska-Gołąb<sup>2</sup> and Monika Marzec<sup>2</sup>

<sup>1</sup>Institute of Nuclear Physics Polish Academy of Sciences, PL-31342 Kraków, Poland

<sup>2</sup>M. Smoluchowski Institute of Physics, Jagiellonian University, PL-30348 Krakow, Poland

<sup>3</sup>Application Laboratories, Rigaku Corporation, Tokyo 196-8666, Japan

<sup>4</sup>Institute of Chemistry, Military University of Technology, PL-00908 Warsaw, Poland

<sup>#</sup>current affiliation: Faculty of Materials Science and Ceramics, AGH University of Science and Technology, PL-30059 Krakow, Poland

### Supplementary Materials

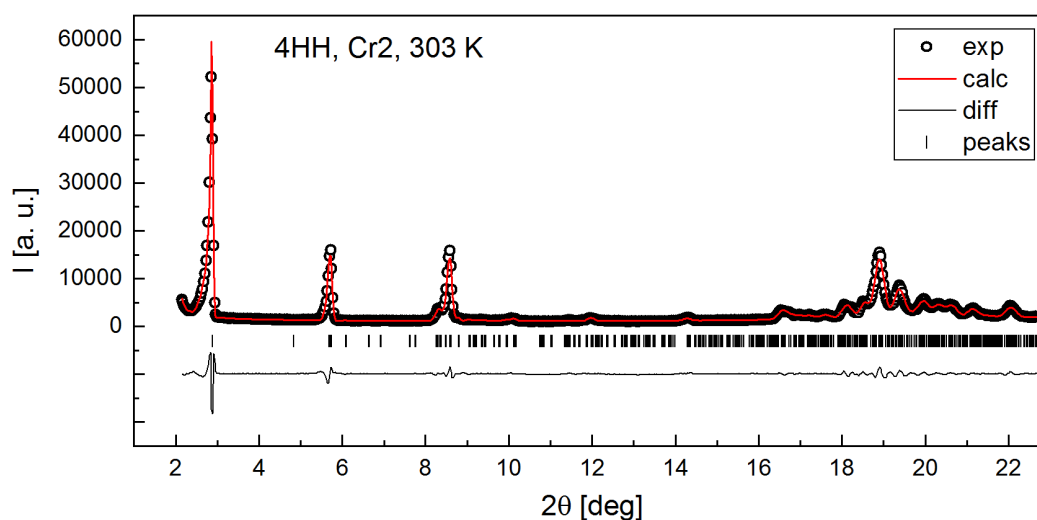

Figure S1. Le Bail refinement of the unit cell parameters of the Cr2 phase of 4HH in 303 K.

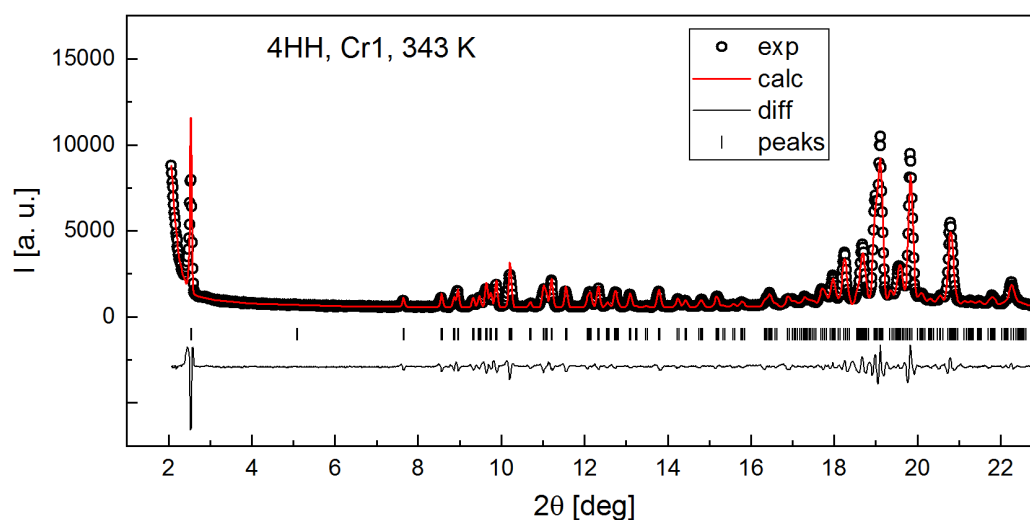

Figure S2. Le Bail refinement of the unit cell parameters of the Cr1 phase of 4HH in 343 K.

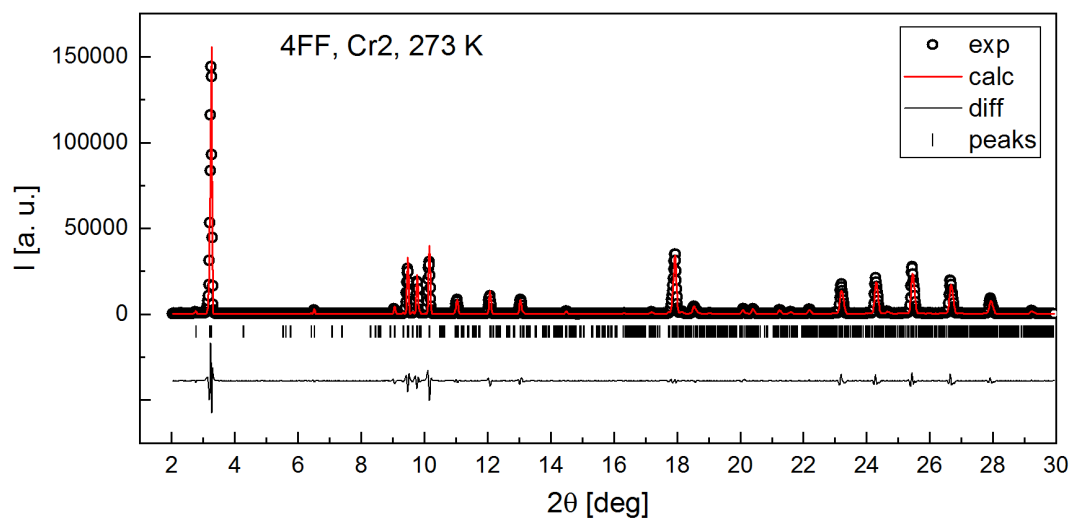

Figure S3. Le Bail refinement of the unit cell parameters of the Cr2 phase of 4FF in 273 K.

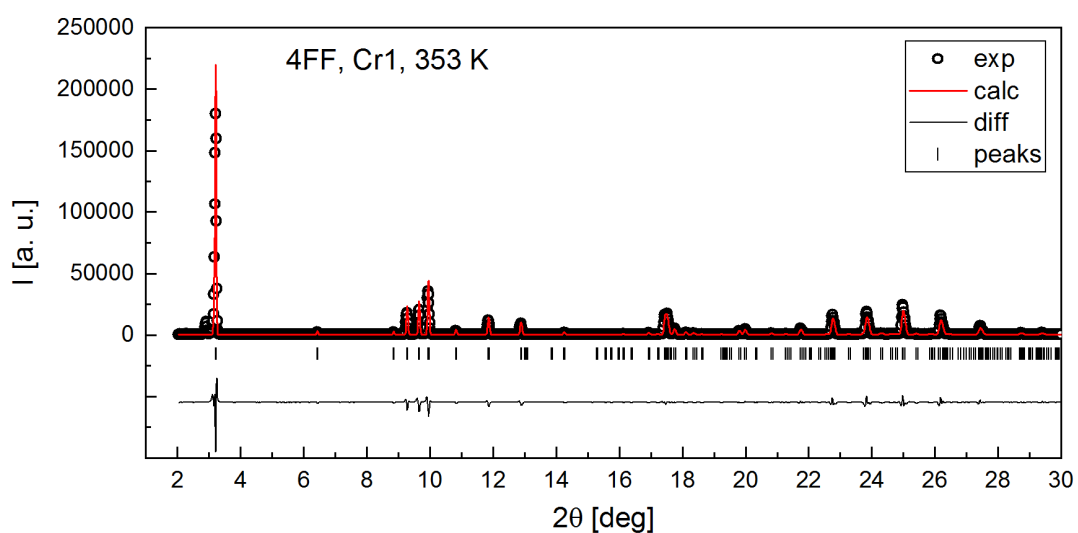

Figure S4. Le Bail refinement of the unit cell parameters of the Cr1 phase of 4FF in 353 K.
